# Supplementary material
Source: PubMed Central journal article supplement (PMC2568922)
Supplement: M804279200_1.pdf [file M804279200_1.pdf]

# Characterization of the tautomycin biosynthetic gene cluster from *Streptomyces spiroverticillatus* unveiling new insights into dialkylmaleic anhydride and polyketide biosynthesis\*

Wenli Li,<sup>†</sup> Jianhua Ju,<sup>†</sup> Scott R. Rajski,<sup>†</sup> Hiroyuki Osada,<sup>‡</sup> and Ben Shen<sup>†,‡,§,\*</sup>

From the <sup>†</sup>Division of Pharmaceutical Sciences, <sup>‡</sup>University of Wisconsin National Cooperative Drug Discovery Group, and <sup>§</sup>Department of Chemistry, University of Wisconsin-Madison, Madison, Wisconsin, 53705, and <sup>‡</sup>Antibiotics Laboratory, Discovery Research Institute, RIKEN, Wako 351-0198, Japan

Running title: Tautomycin biosynthetic gene cluster from *S. spiroverticillatus*

Address correspondence to: Ben Shen, Division of Pharmaceutical Sciences, School of Pharmacy, University of Wisconsin-Madison, 777 Highland Ave., Madison, WI 53705, Tel: (608) 263-2673; Fax: (608) 262-5245; Email: [bshen@pharmacy.wisc.edu](mailto:bshen@pharmacy.wisc.edu)

## SUPPLEMENTAL DATA

|                                                                                                  |    |
|--------------------------------------------------------------------------------------------------|----|
| TABLE S1. Targeted gene inactivation by the REDIRECT technology in <i>S. spiroverticillatus</i>  | S2 |
| TABLE S2. Southern analysis confirming the genotypes of mutant strains                           | S2 |
| FIGURE S1. Inactivation of <i>ttmJ</i> by gene replacement                                       | S3 |
| FIGURE S2. Inactivation of <i>ttmK</i> by gene replacement                                       | S3 |
| FIGURE S3. Inactivation of <i>ttmP</i> by gene replacement                                       | S4 |
| FIGURE S4. Inactivation of <i>ttmR</i> by gene replacement                                       | S4 |
| FIGURE S5. Inactivation of <i>ttmS</i> by gene replacement                                       | S5 |
| TABLE S3. Expression constructs for complementation to the <i>AttmK</i> and <i>AttmS</i> mutants | S6 |
| References                                                                                       | S6 |

TABLE S1. Targeted gene inactivation by the REDIRECT technology in *S. spiroverticillatus* (1)

| gene        | primers <sup>a</sup>                                                                                                                                                                  | cosmid <sup>b</sup> | strain |
|-------------|---------------------------------------------------------------------------------------------------------------------------------------------------------------------------------------|---------------------|--------|
| <i>ΔtmJ</i> | <i>tmJF1</i> : 5' <u>GCCGGT</u> CACGAACCGGACCGGCTCACGTCCGCCACCGAGATTCCGGGGATCCGTCGACC-3'<br><i>tmJR1</i> : 5'- <u>CACCGCAACGGAATCGGACGGCGCCTCGGGCGT</u> CGCGTCTGTAGGCTGGAGCTGCTTC-3'  | pBS6018             | SB6003 |
| <i>ΔtmK</i> | <i>tmKF1</i> : 5'- <u>GTGGTGGAGACGTCGTCCGGCTCGATT</u> CGGGGCTTCTGATTCCGGGGATCCGTCGACC-3'<br><i>tmKR1</i> : 5'- <u>TCAGTCCGCCGGTACGCCGATCCGGTGC</u> GGGGCCGGTGTGTAGGCTGGAGCTGCTTC-3'   | pBS6019             | SB6004 |
| <i>ΔtmP</i> | <i>tmPF1</i> : 5'- <u>ATGGCGATTCCGCGCGGCAGAACCGAATGTGGCAGGCCGA</u> -TTCCGGGGATCCGTCGACC-3'<br><i>tmPR1</i> : 5'- <u>TCATGCCCGGCTCCCCGGCCGTCGAGCGGGCGGGCGCTGTAGGCTGGAGCTGCTTC</u> -3'  | pBS6021             | SB6006 |
| <i>ΔtmR</i> | <i>tmRF1</i> : 5'- <u>GTGACCCCGGCCGAACCGGCTGGGCGCGCTGGCCGA</u> ACTCATTCCGGGGATCCGTCGACC-3'<br><i>tmRR1</i> : 5'- <u>TCAGGTCGCCGAACGCAGCAGGCAGGTGATCGCCCGGGTGTAGGCTGGAGCTGCTTC</u> -3' | pBS6022             | SB6007 |
| <i>ΔtmS</i> | <i>tmSF1</i> : 5'- <u>ATGACGG-ACGCGCGAACCGGTGCGCTGCTGGCCGTGCTG</u> ATTCCGGGGATCCGTCGACC-3'<br><i>tmSR1</i> : 5'- <u>TCACGCGCCCACCACCGCATCGGCCGGATCGGGGA</u> ACTGTAGGCTGGAGCTGCTTC-3'  | pBS6023             | SB6008 |

<sup>a</sup>Underlined letters represent the 39 nt homologous to the DNA regions internal to targeted genes.

<sup>b</sup>pBS6018 and pBS6019 are based on pBS6016, and pBS6021, pBS6022 and pBS6023 are based on pBS6017.

TABLE S2. Southern Analysis Confirming the Genotypes of Mutant Strains<sup>a</sup>

| strains | gene targeted | probe                                                                                       |           | fragment replaced (bp) | Restriction digestion | Signal Size (kp) |            |
|---------|---------------|---------------------------------------------------------------------------------------------|-----------|------------------------|-----------------------|------------------|------------|
|         |               | primers used to amplify the probe                                                           | Size (bp) |                        |                       | WT               | mutant     |
| SB6003  | <i>ΔtmJ</i>   | <i>tmJFP2</i> : 5'-GGACGCCGAATACTGGTGC-3'<br><i>tmJRP2</i> : 5'-GGGCGAGATGCCGAAGAA-3'       | 918       | 288                    | <i>Bam</i> HI         | 4.0              | 3.5        |
| SB6004  | <i>ΔtmK</i>   | <i>tmKFP2</i> : 5'-CGGTCAGGGCCGCCACGAGCTCTG-3'<br><i>tmKRP2</i> : 5'-CCCGAGTGGAGGTGTTTCG-3' | 853       | 1292                   | <i>Bam</i> HI         | 3.7              | 1.3        |
| SB6006  | <i>ΔtmP</i>   | <i>tmPFP2</i> : 5'-GGC-TGGTGTCCATGGTCGGC-3'<br><i>tmPRP2</i> : 5'-GAACTTCAGCCGGGCACCC-3'    | 1405      | 1156                   | <i>Pvu</i> I          | 3.3              | 1.7<br>1.4 |
| SB6007  | <i>ΔtmR</i>   | <i>tmRFP2</i> : 5'-GAACCGGTCGCCGAGAACG-3'<br><i>tmRRP2</i> : 5'-GGCATGCCCTGCTCCCCG-3'       | 1490      | 1324                   | <i>Sma</i> I          | 1.6              | 2.3        |
| SB6008  | <i>ΔtmS</i>   | <i>tmSFP2</i> : 5'-ACGCGTCGGTCTGTTCCGCG-3'<br><i>tmSRP2</i> : 5'-TACCTGGGGCACGCGACC-3'      | 659       | 747                    | <i>Apa</i> I          | 1.6              | 2.2        |

<sup>a</sup>See Figures S1, S2, S3, S4, S5 for details.

FIGURE S1. Inactivation of *ttmJ* by gene replacement. (A) Construction of the  $\Delta$ *ttmJ* gene replacement mutant and restriction maps of *S. spiroverticillatus* wild-type and SB6003 mutant strains showing predicted fragment sizes upon *Bam*HI digestion. (B) Southern analysis of the wild-type (lane 5) and SB6003 (lanes 2, 3 and 4 are three individual isolates) genomic DNAs digested with *Bam*HI using the 918-bp amplified DNA fragment as a probe. Lane 1, molecular weight standard.

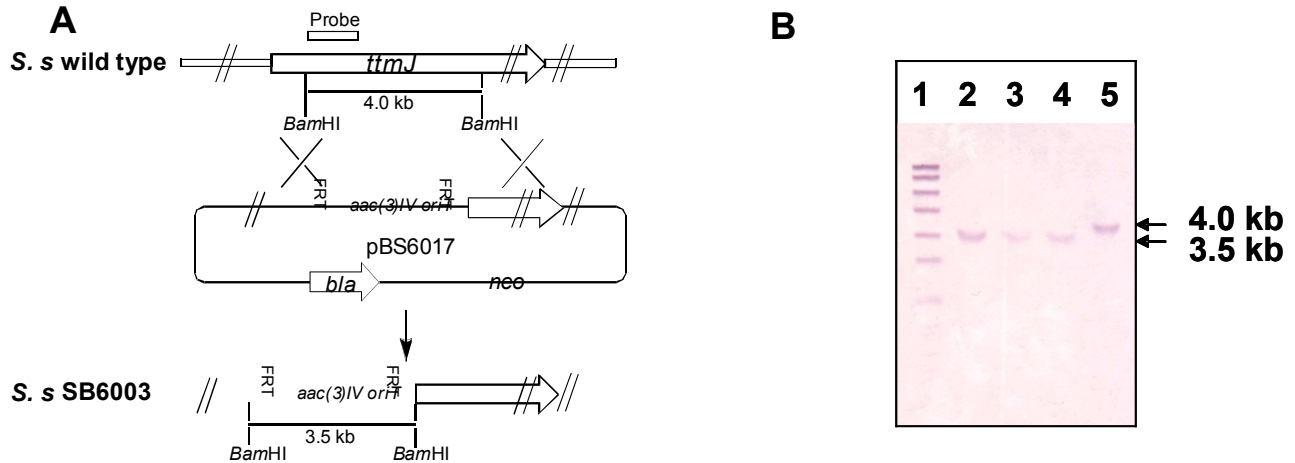

FIGURE S2. Inactivation of *ttmK* by gene replacement. (A) Construction of the  $\Delta$ *ttmK* gene replacement mutant and restriction maps of *S. spiroverticillatus* wild-type and SB6004 mutant strains showing predicted fragment sizes upon *Bam*HI digestion. (B) Southern analysis of the wild-type (lane 1) and SB6004 (lanes 2, 3 and 4 are three individual isolates) genomic DNAs digested with *Bam*HI using the 853-bp amplified DNA fragment as a probe. Lane 5, molecular weight standard.

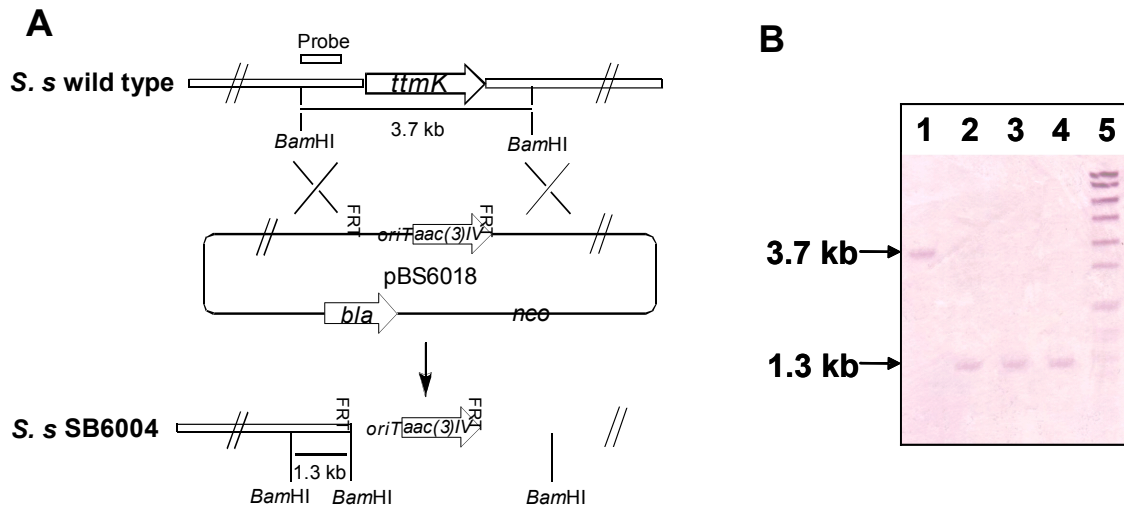

FIGURE S3. Inactivation of *ttmP* by gene replacement. (A) Construction of the *AttmP* gene replacement mutant and restriction maps of *S. spiroverticillatus* wild-type and SB6006 mutant strains showing predicted fragment sizes upon *PvuI* digestion. (B) Southern analysis of the wild-type (lane 2) and SB6006 (lanes 3 and 4 are two individual isolates) genomic DNAs digested with *PvuI* using the 1405-bp amplified DNA fragment as a probe. Lane 1, molecular weight standard.

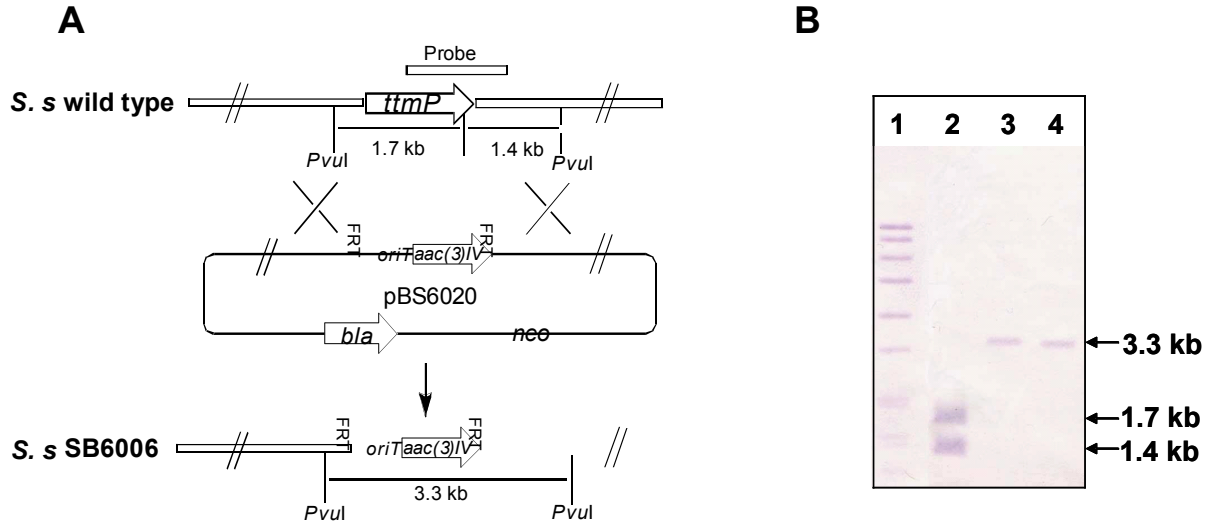

FIGURE S4. Inactivation of *ttmR* by gene replacement. (A) Construction of the *AttmR* gene replacement mutant and restriction maps of *S. spiroverticillatus* wild-type and SB6007 mutant strains showing predicted fragment sizes upon *SmaI* digestion. (B) Southern analysis of the wild-type (lane 8) and SB6007 (lanes 2-7 are six individual isolates) genomic DNAs digested with *SmaI* using the 1490-bp amplified DNA fragment as a probe. Lane 1, molecular weight standard.

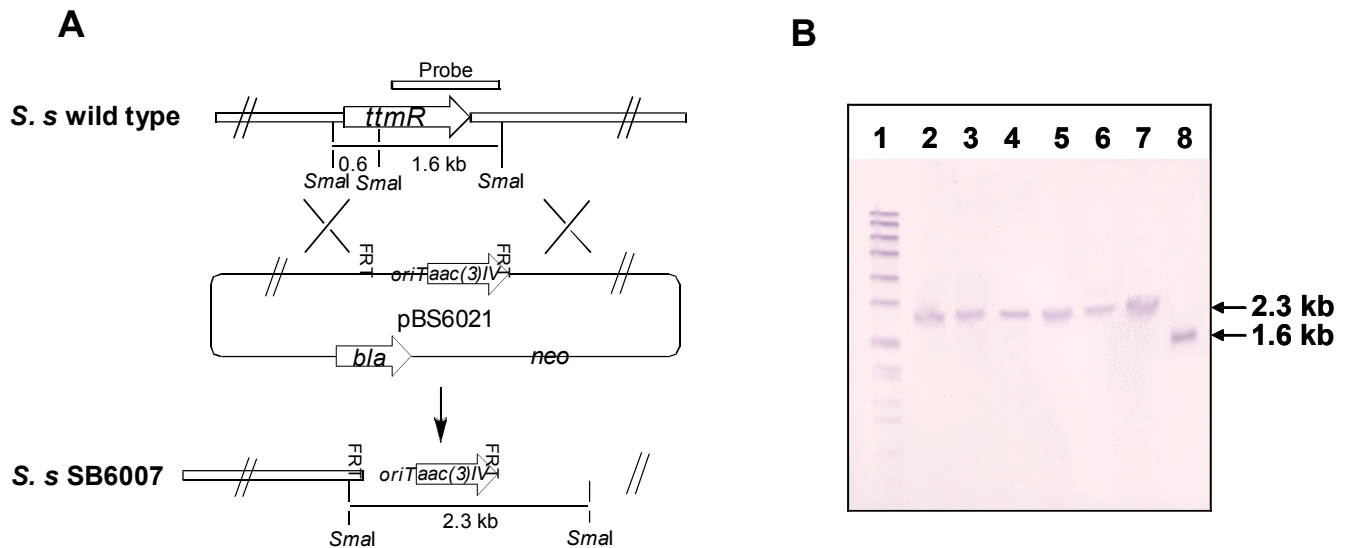

FIGURE S5. Inactivation of *ttnS* by gene replacement. (A) Construction of the  $\Delta ttnS$  gene replacement mutant and restriction maps of *S. spiroverticillatus* wild-type and SB6008 mutant strains showing predicted fragment sizes upon *ApaI* digestion. (B) Southern analysis of the wild-type (lane 3) and SB6008 (lanes 1 and 2 are two individual isolates) genomic DNAs digested with *ApaI* using the 659-bp amplified DNA fragment as a probe.

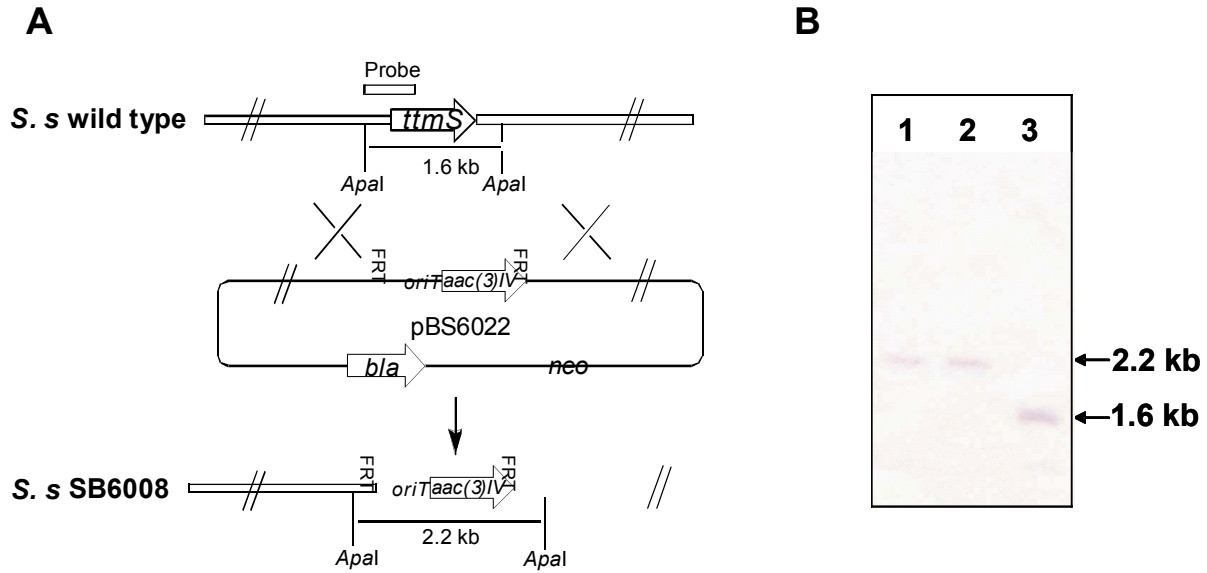

TABLE S3. Expression constructs for complementation to the *AtmK* and *AtmS* mutants

| mutant strain | gene mutated | primers used to make the expression constructs <sup>a</sup>                                                                                  | construct            | complemented strain |
|---------------|--------------|----------------------------------------------------------------------------------------------------------------------------------------------|----------------------|---------------------|
| -             | -            | <i>ErmE</i> *p-FP: 5'-TAGAATTCGTGATGCTAGTCGCGGTTGATC-<br><i>ErmE</i> *p-RP:5'-<br>TAGAATTCGTAATCATGCATTATCTCCTTCTCGCTGGATCCTA<br>CCAACCGG-3' | pBS6027 <sup>b</sup> | -                   |
| SB6004        | <i>AtmK</i>  | <i>tmK</i> FP3: 5'-CCAATGCATATGGTGGAGACGTCGTCC-3'<br><i>tmK</i> RP3: 5'-GCTCTAGATCAGTCCGCCGGTACGC-3'                                         | pBS6024 <sup>c</sup> | SB6009              |
| SB6008        | <i>AtmS</i>  | <i>tmS</i> FP3: 5'-CCAATGCATGACGGACGCGCGAA-3'<br><i>tmS</i> RP3: 5'-GCTCTAGATCACGCGCCACCACCG-3'                                              | pBS6026 <sup>c</sup> | SB6011              |

<sup>a</sup>*Eco*RI, *Nsi*I and *Xba*I restriction sites are underlined.

<sup>b</sup>This construct was generated by inserting the *ErmE*\* promoter amplified from pWHM79 (2) at the *Eco*RI site of pBS8004 (3).

<sup>c</sup>These constructs were generated by inserting the PCR-amplified *tmK* or *tmS* fragment from pBS6004 into *Nsi*I and *Xba*I sites of pBS6027.

## References

- S1. Gust, B., Challis, G. L., Fowler, K., Kieser, T., and Chater, K. F. (2003) *Proc. Natl. Acad. Sci. USA* **100**, 1541-1546
- S2. Shen, B., and Hutchinson, C. R. (1996) *Proc. Natl. Acad. Sci. USA* **93**, 6600-6604
- S3. Tao, M., Wang, L., Wendt-Pienkowski, E., George, N. P., Zhang, G., Coughlin, J. M., and Shen, B. (2007) *Mol. Biosyst.* **3**, 60-74
